# Supplementary material for: Autophagy and pulmonary disease
Source: PubMed Central journal article supplement — Ther Adv Respir Dis. 2019 Nov 27;13:1753466619890538. doi: 10.1177/1753466619890538 (PMC6887802; doi:10.1177/1753466619890538), 2019-11-27
Supplement: Reviewer_1_v.2.pdf [file Reviewer_1_v.2.pdf]

Reviewer 1 v.2

Comments to the Author

Although the authors have described the figures in the text, a brief description for the mechanisms displayed in Figures 2-7 should be provided separately as Figure legends.

Please increase the font size of the arrows in Figure 2 like those in subsequent figures.
