# Supplementary material for: Autophagy and pulmonary disease
Source: PubMed Central journal article supplement — Ther Adv Respir Dis. 2019 Nov 27;13:1753466619890538. doi: 10.1177/1753466619890538 (PMC6887802; doi:10.1177/1753466619890538), 2019-11-27
Supplement: Reviewer_2_v.1.pdf [file Reviewer_2_v.1.pdf]

## Reviewer 2 v.1Comments to the Author

This is a well written and comprehensive review of Autophagy and pulmonary disease. This is an important and evolving concept in pulmonary disease. However, this

review overlaps with previous reviews on pulmonary disease. Authors should refer

to more recent work and develop a new point of view. For instance, authors need to expand the idea of autosis further and explain its relationship with COPD in terms of pathophysiology and therapeutic possibility. Furthermore, figures or tables are needed to lead the reader to understand. Some points the authors should consider:

1) The quality of English is not up to standard in large sections of the review. The authors should consider having the review checked for sentence structure, grammar and appropriate use of terminology.

2) The "cigarette smoke(CS)" may be changed into "CSE(cigarette smoke extract)"

3) 4.1 Wu Yet al. found that the levels of autophagy (LC3II/I and beclin-1 levels) in PBMCs in COPD patients were increased and the extent of PBMC autophagy was negatively correlated with FEV1% predicted. FEV1% should be FEV1/FVC?
